# Supplementary material for: Graphene/carbon nanospheres sandwich supported PEMfuel cell metal nanocatalysts with remarkably high activity and stability
Source: Royal Society of Chemistry journal article supplement (doi:10.1039/c2ta00606e), 2012-11-29
Supplement: c2ta00606e.pdf [file c2ta00606e.pdf]

*Electronic supplementary information (ESI)*

**Graphene/carbon nanospheres sandwich supported PEM fuel cell metal  
nanocatalysts with remarkable high activity and stability**

Fig. S1 shows SEM images of GNS and GCS. Differently from the smooth surface of GNS (Fig. S1a), the GNS shows a much rougher surface due to that CNS particles on the graphene surface act as nanoscale spacers and increase the spacing between adjacent carbon sheets preventing face-to-face van der Waals contact between neighboring graphene sheets (Fig. S1b). Figure S1c gives a clear shown of CNS particles between the GNS layers.

**Figure S1**

**a**

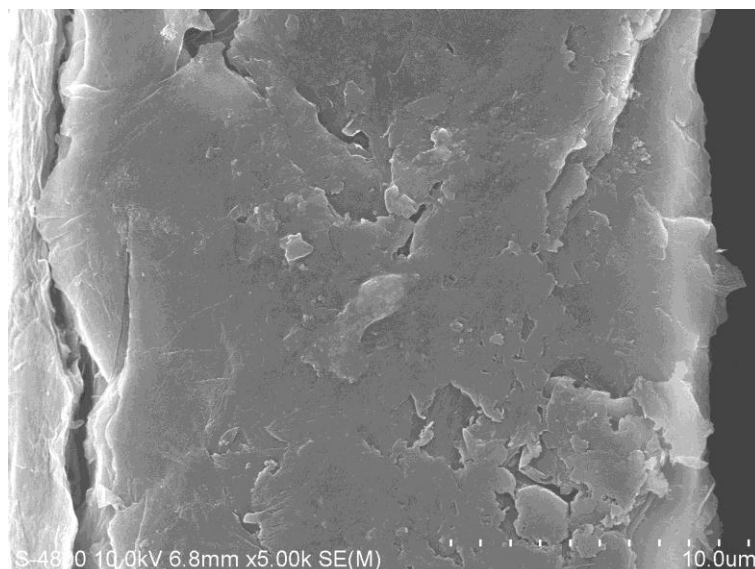

b

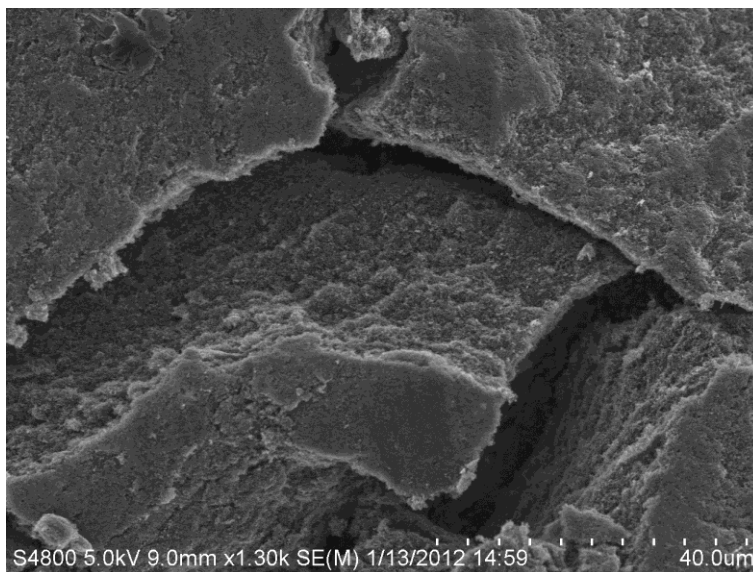

c

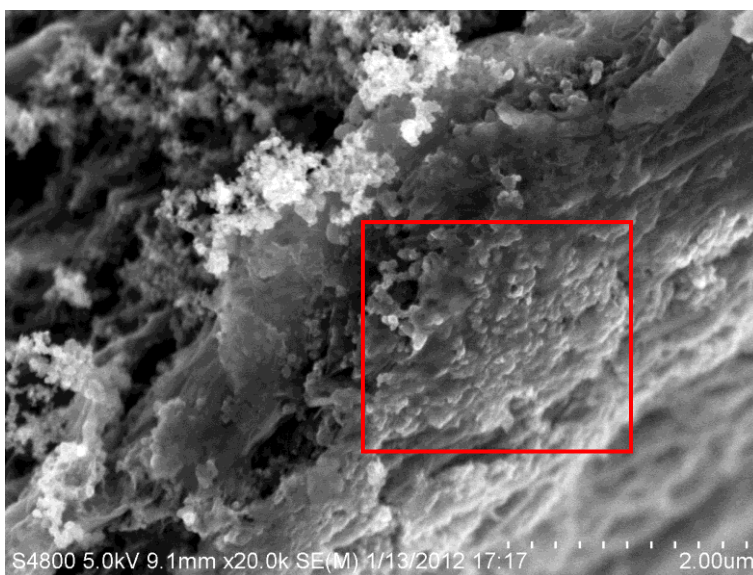

Fig. S1 SEM images of GNS (a) and GCG (b, c)
